# Supplementary material for: Folate/homocysteine metabolism and lung cancer risk among smokers
Source: PubMed Central journal article supplement (PMC6445430; doi:10.1371/journal.pone.0214462), 2019-04-02
Supplement: pone.0214462.s001.pdf [file pone.0214462.s001.pdf]

## Folate/homocysteine metabolism and lung cancer risk among smokers

Stanisławska-Sachadyn A, Borzyszkowska J, Krzemiński M, Janowicz A, Dziadziuszko R, Jassem J, Rzyman W, Limon J

### Supporting information, S1 Fig

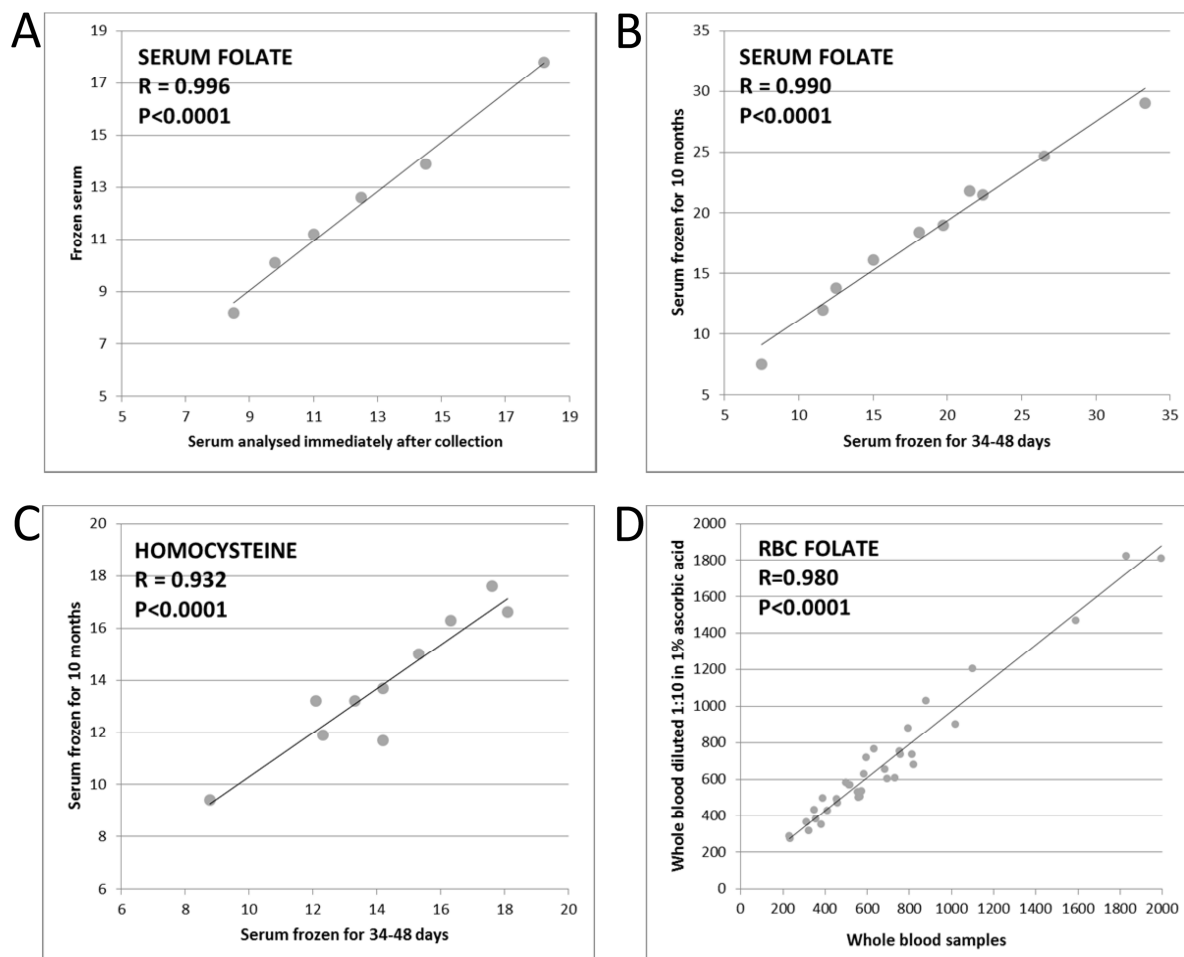

**S1 Fig. Correlations between the metabolite values determined from differently treated aliquots of randomly selected samples** A) folate concentration determined from serum samples within a day of blood collection vs. serum samples frozen for a few days; B) folate concentrations determined from serum samples frozen for 34-48 days vs. serum samples frozen for 10 months; C) homocysteine concentrations determined from serum samples frozen for 34-48 days vs. serum samples frozen for 10 months; D) RBC folate concentrations determined from whole blood vs. whole blood diluted 1:10 in 1% ascorbic acid, frozen for 2 years. The measures were corrected for the hematocrit values. Correlations were calculated using Pearson statistics.
