# Supplementary material for: Folate/homocysteine metabolism and lung cancer risk among smokers
Source: PubMed Central journal article supplement (PMC6445430; doi:10.1371/journal.pone.0214462), 2019-04-02
Supplement: pone.0214462.s002.pdf [file pone.0214462.s002.pdf]

**Folate/homocysteine metabolism and lung cancer risk among smokers**

Stanisławska-Sachadyn A, Borzyszkowska J, Krzemiński M, Janowicz A, Dziadziuszko R, Jassem J, Rzyman W, Limon J

**Supporting information, S1 Table****S1 Table. Genotyping conditions**

| <b>Polymorphisms</b>    | <b>Probes, primers, other reagents</b> |        | <b>Thermal profile</b> |
|-------------------------|----------------------------------------|--------|------------------------|
| <b>Taqman method</b>    |                                        |        |                        |
| rs1801133               | T: 6FAM-ATGAAATCGACTCCCGC-MGBNFQ*      | 50 nM  | 95°C for 10 min        |
| <i>MTHFR</i> c.665C>T   | C: VIC-ATGAAATCGGCTCCCGC-MGBNFQ*       | 50 nM  | 95°C for 30 s          |
|                         | F: GCAGGGAGCTTTGAGGCTGACC [1]          | 0.5 µM | 59°C for 1 min         |
|                         | R: TGGGGCAAGTGATGCCCATGT [1]           | 0.5 µM | repeat 50 times        |
| rs1801131               | C: 6FAM-AGACACTTGCTTCACT-MGBNFQ*       | 50 nM  | 95°C for 10 min        |
| <i>MTHFR</i> c.1286A>C  | A: VIC-CAAAGACACTTTCTTC-MGBNFQ*        | 50 nM  | 95°C for 30 s          |
|                         | F: GAGGAGCTGCTG AAGATG T [1]           | 0.5 µM | 56°C for 1 min         |
|                         | R: CGAGAGGTAAAGAACGAAGA [1]            | 0.5 µM | repeat 50 times        |
| rs1805087               | G: 6FAM-ACAGGGCCATTATG-MGBNFQ*         | 50 nM  | 95°C-10 min            |
| <i>MTR</i> c.2756A>G    | A: VIC-ATTAGACAGGACCATTATG-MGBNFQ*     | 50 nM  | 95 °C -30 s            |
|                         | F: AGTGTTCCCAGCTGTTAGATGA [1]          | 0.5 µM | 62 °C -1 min           |
|                         | R: TGTTTCTACCACTTA CCTTGAGAGACT*       | 0.5 µM | repeat 50 times        |
| rs1801394               | G: 6FAM-CTTGCTCACACATTT-MGBNFQ*        | 50 nM  | 95°C-10 min            |
| <i>MTRR</i> c.66A>G     | A: VIC-TGCTCACATATTTTC-MGBNFQ*         | 50 nM  | 92 °C -30 s            |
|                         | F: CATGCCTTGAAGTGATGAGG*               | 0.5 µM | 60 °C -1 min           |
|                         | R: GATCTGCAGAAAATCCATGTACCA*           | 0.5 µM | repeat 50 times        |
| rs1979277               | C: 6FAM-CGCCTCTCTCTTC-MGBNFQ [2]       | 50 nM  | 95°C-10 min            |
| <i>SHMT1</i> c.1420C>T  | T: VIC-TCGCCTCTTTCTTC-MGBNFQ [3]       | 50 nM  | 95 °C -30 s            |
|                         | F: AGGAGAGACTGGCAGGGGAT [3]            | 0.5 µM | 60 °C -60 s            |
|                         | R: CATCCATCTCTCAGGTGGGG [3]            | 0.5 µM | repeat 50 times        |
| rs61510559              | T: 6FAM-CGAGGTGCCGCCAG-MGBNFQ [4]      | 100 nM | 95°C-10 min            |
| <i>SLC19A1</i> c.80G>A  | C: VIC-CACGAGGCGCCGC-MGBNFQ [4]        | 50 nM  | 95 °C -30 s            |
|                         | F: GGCCTGACCCCGAGCT [4]                | 0.5 µM | 63 °C -1 min           |
|                         | R: AGCCGTAGAAGCAAAGGTAGCA [4]          | 0.5 µM | repeat 60 times        |
| rs2236225               | G: 6FAM-TGCAGACCGGATC-MGBNFQ [3]       | 50 nM  | 95°C-10 min            |
| <i>MTHFD1</i> c.1958G>A | A: VIC-AGACCAGATCGCACT-MGBNFQ [3]      | 50 nM  | 95 °C -30 s            |
|                         | F: GTTTGCCAACATCGCACAT [3]             | 0.5 µM | 60 °C -1 min           |
|                         | R: CATAAGTCTATTCCTGTTTGC [3]           | 0.5 µM | repeat 50 times        |

|                                |                                                         |        |                 |
|--------------------------------|---------------------------------------------------------|--------|-----------------|
| rs1801198                      | G: 6FAM-CCCCACGCATGGG-MGBNFQ*                           | 50 nM  | 96°C 5 min      |
| <i>TCN2</i> c.776C>G           | C: VIC-CCCCAGGCATGGG-MGBNFQ*                            | 100 nM | 96°C 10 s       |
|                                | F: TCACCAGTTCCTCATGACTT                                 | 0.5 µM | 60°C 10 s       |
|                                | R: GAGCATTCTGGAAGGCT                                    | 0.5 µM | 72°C 20 s       |
|                                |                                                         |        | repeat 50 times |
| rs202243265                    | ins: 6FAM-TGGTTATGAACTTTATAGTTG-MGBNFQ [4]              | 50 nM  | 95°C-10 min     |
| rs11280056                     | del: VIC-TGGTTATGAACTTTAAAGTT-MGBNFQ [4]                | 50 nM  | 92 °C -30 s     |
| rs16430                        | F: AGCTGAGTAACACCATCGATCATG [4]                         | 0.5 µM | 60 °C -1 min    |
| <i>TYMS</i> 3'UTR ins/del      | R: GGACGAATGCAGAACACTTCTTTA [4]                         | 0.5 µM | repeat 50 times |
| <b>PCR method</b>              |                                                         |        |                 |
| <i>TYMS</i> 5'UTR 2R/3R        | F: GTGGCTCCTGCGTTTCCCCC [5]                             | 0.5 µM | 96°C-5 min      |
|                                | R: CCGCGCCATGCCTGTGGCCGGCTCGGAGC                        | 0.5 µM | 96 °C -1 min    |
|                                | dNTPs                                                   | 800 µM | 64 °C -1 min    |
|                                | 10x conc. PCR buffer (Thermo Scientific)                | 2 µl   | 72 °C -1 min    |
|                                | MgCl <sub>2</sub>                                       | 1.5 mM | repeat 35 times |
|                                | Maxima Hot Start Taq DNA polymerase (Thermo Scientific) | 0.35 U | 72 °C -5 min    |
|                                | DMSO                                                    | 0.5 µl |                 |
|                                | Genomic DNA                                             | 2 µl   |                 |
|                                | Total volume                                            | 20 µl  |                 |
| <i>DHFR</i><br>c.86+60_78ins22 | F :CCACGGTCGGGGTACCTGGG [6]                             | 0.5 µM | 94°C-4 min      |
|                                | F: ACGGTCGGGGTGGCCGACTC [6]                             | 0.5 µM | 94 °C -55 s     |
|                                | R: AAAAGGGGAATCCAGTCGG [6]                              | 1 µM   | 65 °C - 55 s    |
|                                | dNTPs                                                   | 800 µM | 72 °C - 55 s    |
|                                | 10x conc. PCR buffer (Thermo Scientific)                | 2.5 µl | repeat 40 times |
|                                | MgCl <sub>2</sub>                                       | 2.5 mM | 72 °C -12 min   |
|                                | Taq DNA polymerase (Thermo Scientific)                  | 0.25 U |                 |
|                                | Genomic DNA                                             | 5 µl   |                 |
|                                | Total volume                                            | 25 µl  |                 |
| <i>CBS</i> c.844_845ins68      | F: TATTGGCCACTCCCATAATAGA [7]                           | 0.5 µM | 94°C-5 min      |
|                                | R: CGGCTCTGCGAGGATGGACCCTT [7]                          | 0.5 µM | 94 °C -1 min    |
|                                | dNTPs                                                   | 800 µM | 59 °C -1 min    |
|                                | 10x conc. PCR buffer (Thermo Scientific)                | 2 µl   | 72 °C -1 min    |
|                                | MgCl <sub>2</sub>                                       | 1.5 mM | repeat 35 times |
|                                | Taq DNA polymerase (Thermo Scientific)                  | 0.25 U | 72 °C -5 min    |
|                                | Genomic DNA                                             | 2 µl   |                 |
|                                | Total volume                                            | 20 µl  |                 |

\*primers / probes sequences were obtained from SNP500 Cancer website (<http://snp500cancer.nci.nih.gov/cgfseq/pages/snp500.do>).

## References

1. Summers CM, Cucchiara AJ, Nackos E, Hammons AL, Mohr E, Whitehead AS, et al. Functional polymorphisms of folate-metabolizing enzymes in relation to homocysteine concentrations in systemic lupus erythematosus. *J Rheumatol.* 2008;35(11):2179-86.
2. Skibola CF, Smith MT, Kane E, Roman E, Rollinson S, Cartwright RA, et al. Polymorphisms in the methylenetetrahydrofolate reductase gene are associated with susceptibility to acute leukemia in adults. *Proc Natl Acad Sci U S A.* 1999;96(22):12810-5.
3. Summers CM, Mitchell LE, Stanislawski-Sachadyn A, Baido SF, Blair IA, Von Feldt JM, et al. Genetic and lifestyle variables associated with homocysteine concentrations and the distribution of folate derivatives in healthy premenopausal women. *Birth Defects Res A Clin Mol Teratol.* 2010;88(8):679-88.
4. Skibola CF, Forrest MS, Coppede F, Agana L, Hubbard A, Smith MT, et al. Polymorphisms and haplotypes in folate-metabolizing genes and risk of non-Hodgkin lymphoma. *Blood.* 2004;104(7):2155-62.
5. Brown KS, Kluijtmans LA, Young IS, McNulty H, Mitchell LE, Yarnell JW, et al. The thymidylate synthase tandem repeat polymorphism is not associated with homocysteine concentrations in healthy young subjects. *Hum Genet.* 2004;114(2):182-5.
6. Johnson WG, Stenroos ES, Szychala JR, Chatkupt S, Ming SX, Buyske S. New 19 bp deletion polymorphism in intron-1 of dihydrofolate reductase (DHFR): a risk factor for spina bifida acting in mothers during pregnancy? *Am J Med Genet A.* 2004;124A(4):339-45.
7. Barbaux S, Kluijtmans LA, Whitehead AS. Accurate and rapid "multiplex heteroduplexing" method for genotyping key enzymes involved in folate/homocysteine metabolism. *Clin Chem.* 2000;46(7):907-12.
