# Supplementary material for: Folate/homocysteine metabolism and lung cancer risk among smokers
Source: PubMed Central journal article supplement (PMC6445430; doi:10.1371/journal.pone.0214462), 2019-04-02
Supplement: pone.0214462.s003.pdf [file pone.0214462.s003.pdf]

**Folate/homocysteine metabolism and lung cancer risk among smokers**

Stanisławska-Sachadyn A, Borzyszkowska J, Krzemiński M, Janowicz A, Dziadziuszko R, Jassem J, Rzyman W, Limon J

**Supporting information, S2 Table****S2 Table. Median (interquartile ranges), N, of serum folate, RBC folate, corrected RBC folate and homocysteine defined by genotypes in C1 metabolism genes.**

Two outlying extreme values were deleted from the analyses: serum folate = 800.5; 565.4 nmol/l.

| Variable                           |                             | Lung cancer cases*        | Controls*                 | P <sub>wilcoxon</sub> |
|------------------------------------|-----------------------------|---------------------------|---------------------------|-----------------------|
| <b>MTHFR c.665C&gt;T</b>           |                             |                           |                           |                       |
| Serum folates<br>nmol/L            | CC                          | 18.8 ( 14.3-24.7), 65     | 17.7 (13.4-23.4), 157     | 0.383                 |
|                                    | CT                          | 20.4 ( 13.6-24.0), 55     | 17.6 (12.9-22.7), 198     | 0.227                 |
|                                    | TT                          | 16.75 ( 10.3-20.6), 12    | 16.1 (11.1-22.0), 39      | 0.885                 |
|                                    | P <sub>Kruskal-Wallis</sub> |                           | 0.505                     | 0.591                 |
| RBC folates<br>nmol/L              | CC                          | 533.3 ( 436.1-721.9), 47  | 508.35 (363.3-697.9), 110 | 0.538                 |
|                                    | CT                          | 563.3 ( 378.75-674.8), 36 | 496.4 (382.7-638.1), 147  | 0.463                 |
|                                    | TT                          | 627.35 ( 349.6-972.1), 10 | 607.1 (482.6-852.2), 22   | 0.889                 |
|                                    | P <sub>Kruskal-Wallis</sub> |                           | 0.714                     | 0.108                 |
| RBC folates<br>corrected<br>nmol/L | CC                          | 512.6 (401.4-688.0), 47   | 473.05 (345.6-680.0), 110 | 0.582                 |
|                                    | CT                          | 527.9 (358.5-634.8), 36   | 470.95 (362.3-602.0), 146 | 0.454                 |
|                                    | TT                          | 609.55 (335.2-942.0), 10  | 594.95 (457.7-827.7), 22  | 0.889                 |
|                                    | P <sub>Kruskal-Wallis</sub> |                           | 0.624                     | 0.082                 |
| Homocysteine<br>μmol/L             | CC                          | 15.2 (11.4-18.6), 63      | 14.4 (11.6-18.5), 157     | 0.954                 |
|                                    | CT                          | 15.55 (11.4-18.3), 54     | 14.8 (12.2-18.7), 199     | 0.488                 |
|                                    | TT                          | 16.75 (14.85-20.5), 12    | 15.3 (12.3-18.9), 39      | 0.297                 |
|                                    | P <sub>Kruskal-Wallis</sub> |                           | 0.365                     | 0.838                 |
| <b>MTHFR c.1268A&gt;C</b>          |                             |                           |                           |                       |
| Serum folates<br>nmol/L            | AA                          | 19.7 (14.3-23.8), 69      | 17.7 (13.25-23.9), 192    | 0.606                 |
|                                    | AC                          | 18.1 (14.3-25.4), 49      | 16.5 (12.7-22.4), 169     | 0.174                 |
|                                    | CC                          | 19.15 (14.1-28.8), 14     | 19.9 (12.5-23.4), 33      | 0.816                 |
|                                    | P <sub>Kruskal-Wallis</sub> |                           | 0.935                     | 0.475                 |
| RBC folates<br>nmol/L              | AA                          | 539.5 (372.3-756.7), 51   | 516.75 (388.4-670.4), 138 | 0.487                 |
|                                    | AC                          | 560.4 (411.6-661.4), 31   | 481.1 (358.5-642.2), 115  | 0.345                 |
|                                    | CC                          | 566.4 (442-791.3), 11     | 672.2 (468.9-831.1), 26   | 0.332                 |
|                                    | P <sub>Kruskal-Wallis</sub> |                           | 0.746                     | 0.006                 |
| RBC folates<br>corrected<br>nmol/L | AA                          | 515.2 (343.5-729.2), 51   | 477.6 (367.7-633.3), 137  | 0.480                 |
|                                    | AC                          | 531.1 (378.6-622.8), 31   | 446.6 (345.5-601.8), 115  | 0.373                 |
|                                    | CC                          | 541.8 (407.6-764.1), 11   | 642.3 (451.8-794.8), 26   | 0.349                 |
|                                    | P <sub>Kruskal-Wallis</sub> |                           | 0.762                     | 0.005                 |
| Homocysteine<br>μmol/L             | AA                          | 15.88 (11.7-19.6), 67     | 15.0 (12.0-18.8), 193     | 0.602                 |
|                                    | AC                          | 15.4 (11.2-17.25), 48     | 14.6 (12.1-18.75), 168    | 0.328                 |
|                                    | CC                          | 14.85 (11.3-18.6), 14     | 14.05 (11.3-16.0), 34     | 0.602                 |
|                                    | P <sub>Kruskal-Wallis</sub> |                           | 0.443                     | 0.187                 |
| <b>CBS c.844_845ins68</b>          |                             |                           |                           |                       |
| Serum folates<br>nmol/L            | DD                          | 19.15 (14.3-24.3), 110    | 17.5 (12.9-23.1), 341     | 0.248                 |
|                                    | I allele                    | 19.85 (13.8-25.6), 22     | 17.0 (14.5-22.4), 53      | 0.503                 |
|                                    | P <sub>Kruskal-Wallis</sub> |                           | 0.710                     | 0.904                 |
| RBC folates<br>nmol/L              | DD                          | 554.0 (395.7-711.25), 80  | 506.5 (383.3-677.4), 249  | 0.512                 |
|                                    | I allele                    | 560.4 (457.6-773.1), 13   | 508.7 (398.9-660.4), 30   | 0.488                 |
|                                    | P <sub>Kruskal-Wallis</sub> |                           | 0.603                     | 0.979                 |

|                                |                             |                            |                             |       |
|--------------------------------|-----------------------------|----------------------------|-----------------------------|-------|
| RBC folates corrected nmol/L   | DD                          | 520.55 (370.2-677.1), 80   | 474.6 (364.65-645.8), 248   | 0.544 |
|                                | I allele                    | 534.7 (441.5-731.7), 13    | 478.5 (376.3-633.3), 30     | 0.456 |
|                                | $P_{\text{Kruskal-Wallis}}$ |                            | 0.580                       | 0.977 |
| Homocysteine $\mu\text{mol/L}$ | DD                          | 16.0 (11.8-18.7), 107      | 14.8 (12.1-18.7), 342       | 0.971 |
|                                | I allele                    | 14.5 (10.2-18.3), 22       | 12.8 (11.7-17.7), 53        | 0.991 |
|                                | $P_{\text{Kruskal-Wallis}}$ |                            | 0.338                       | 0.057 |
| <b>SHMT1 c.1420C&gt;T</b>      |                             |                            |                             |       |
| Serum folates nmol/L           | CC                          | 20.4 (13.6-24.3), 53       | 17.2 (12.2-22.4), 164       | 0.203 |
|                                | CT                          | 18.6 (14.3-24.5), 61       | 17.7 (13.8-23.1), 185       | 0.649 |
|                                | TT                          | 20.05 (15.6-21.5), 18      | 15.6 (12.2-24.3), 45        | 0.589 |
|                                | $P_{\text{Kruskal-Wallis}}$ |                            | 0.966                       | 0.499 |
| RBC folates nmol/L             | CC                          | 566.2 (372.3-733.7), 37    | 483.3 (383.5-643.3), 119    | 0.217 |
|                                | CT                          | 560.4 (401.5-675.2), 49    | 532.2 (387.25-741.55), 124  | 0.721 |
|                                | TT                          | 533.3 (443.4-790.9), 7     | 511.95 (356.05-669.6), 36   | 0.551 |
|                                | $P_{\text{Kruskal-Wallis}}$ |                            | 0.859                       | 0.349 |
| RBC folates corrected nmol/L   | CC                          | 524.7 (343.5-705.9), 37    | 458.4 (367.7-624.6), 119    | 0.261 |
|                                | CT                          | 531.1 (378.4-653.6), 49    | 507.9 (370.5-699.6), 123    | 0.727 |
|                                | TT                          | 512.6 (415.1-752.0), 7     | 473.8 (336.4-635.05), 36    | 0.529 |
|                                | $P_{\text{Kruskal-Wallis}}$ |                            | 0.827                       | 0.403 |
| Homocysteine $\mu\text{mol/L}$ | CC                          | 14.2 (10.3-17.8), 53       | 14.7 (11.8-18.65), 164      | 0.263 |
|                                | CT                          | 16.6 (13.6-18.7), 58       | 14.7 (12.2-18.3), 185       | 0.188 |
|                                | TT                          | 14.95 (11.2-19.6), 18      | 14.65 (12.4-18.9), 46       | 0.565 |
|                                | $P_{\text{Kruskal-Wallis}}$ | 14.2 (10.3-17.8), 53       |                             | 0.902 |
| <b>MTHFD1 c.1958G&gt;A</b>     |                             |                            |                             |       |
| Serum folates nmol/L           | GG                          | 19.6 (14.5-24.3), 30       | 18.9 (13.1-23.8), 82        | 0.679 |
|                                | GA                          | 18.4 (13.6-24.7), 63       | 17.5 (12.9-22.9), 182       | 0.657 |
|                                | AA                          | 20.4 (14.3-24.7), 39       | 16.65 (12.0-22.4), 130      | 0.195 |
|                                | $P_{\text{Kruskal-Wallis}}$ |                            | 0.790                       | 0.439 |
| RBC folates nmol/L             | GG                          | 582.3 (507.05-808.0), 24   | 524.4 (391.2-741.4), 59     | 0.136 |
|                                | GA                          | 522.35 (362.85-712.65), 44 | 508.35 (382.65-636.65), 124 | 0.533 |
|                                | AA                          | 523.6 (371.8-656.0), 25    | 497.6 (383.0-728.35), 96    | 0.638 |
|                                | $P_{\text{Kruskal-Wallis}}$ |                            | 0.205                       | 0.624 |
| RBC folates corrected nmol/L   | GG                          | 556.75 (475.3-776.75), 24  | 486.1 (370.5-701.2), 59     | 0.141 |
|                                | GA                          | 502.5 (340.95-677.1), 44   | 476.05 (364.3-599.55), 124  | 0.560 |
|                                | AA                          | 501.6 (328.5-616.3), 25    | 470.9 (362.3-707.6), 95     | 0.610 |
|                                | $P_{\text{Kruskal-Wallis}}$ |                            | 0.204                       | 0.648 |
| Homocysteine $\mu\text{mol/L}$ | GG                          | 16.6 (11.2-18.7), 29       | 14.7 (12.5-19.6), 83        | 0.974 |
|                                | GA                          | 15.8 (11.7-18.6), 61       | 14.9 (12.0-18.7), 181       | 0.881 |
|                                | AA                          | 14.8 (11.4-18.1), 39       | 14.4 (11.6-18.0), 131       | 0.979 |
|                                | $P_{\text{Kruskal-Wallis}}$ |                            | 0.746                       | 0.504 |
| <b>MTRR c.66A&gt;G</b>         |                             |                            |                             |       |
| Serum folates nmol/L           | GG                          | 20.4 (15.9-24.3), 50       | 18.1 (12.7-23.1), 119       | 0.154 |
|                                | GA                          | 18.8 (13.6-22.9), 58       | 17.6 (13.1-23.4), 190       | 0.792 |
|                                | AA                          | 19.6 (13.6-26.55), 24      | 16.3 (12.5-22.0), 85        | 0.226 |
|                                | $P_{\text{Kruskal-Wallis}}$ |                            | 0.337                       | 0.593 |
| RBC folates nmol/L             | GG                          | 533.3 (372.3-702.6), 35    | 462 (333.8-655.1), 81       | 0.314 |
|                                | GA                          | 579.5 (442.0-733.7), 39    | 513.6 (421-667.0), 134      | 0.383 |
|                                | AA                          | 527.5 (371.8-755.0), 19    | 559.4 (386.65-736.45), 64   | 0.884 |
|                                | $P_{\text{Kruskal-Wallis}}$ |                            | 0.707                       | 0.205 |

|                              |                             |                           |                            |       |
|------------------------------|-----------------------------|---------------------------|----------------------------|-------|
| RBC folates corrected nmol/L | GG                          | 508.8 (343.5-676.9), 35   | 441.0 (319.4-621.9), 81    | 0.304 |
|                              | GA                          | 565.5 (405.7-692.7), 39   | 482.3 (389.0-636.6), 134   | 0.438 |
|                              | AA                          | 515.2 (324.7-722.2), 19   | 527.3 (362.3-699.1), 63    | 0.965 |
|                              | P <sub>Kruskal-Wallis</sub> |                           | 0.694                      | 0.194 |
| Homocysteine μmol/L          | GG                          | 15.4 (11.9-19.65), 48     | 14.9 (11.8-18.7), 118      | 0.909 |
|                              | GA                          | 15.6 (11.4-18.3), 57      | 14.7 (12.2-18.7), 190      | 0.618 |
|                              | AA                          | 16.2 (10.55-18.75), 24    | 14.2 (12.0-17.7), 87       | 0.821 |
|                              | P <sub>Kruskal-Wallis</sub> |                           | 0.870                      | 0.822 |
| MTR c.2756A>G                |                             |                           |                            |       |
| Serum folates nmol/L         | AA                          | 19.0 (14.1-23.6), 91      | 18.1 (13.4-23.1), 243      | 0.765 |
|                              | AG                          | 19.85 (14.3-25.85), 36    | 16.5 (12.0-23.1), 133      | 0.154 |
|                              | GG                          | 24.0 (14.7-25.6), 5       | 14.95 (12.2-20.4), 18      | 0.526 |
|                              | P <sub>Kruskal-Wallis</sub> |                           | 0.669                      | 0.253 |
| RBC folates nmol/L           | AA                          | 539.5 (389.9-675.2), 65   | 505.6 (388.4-672.2), 174   | 0.482 |
|                              | AG                          | 566.2 (428.5-719.9), 25   | 517.4 (375.4-725.9), 93    | 0.730 |
|                              | GG                          | 745.8 (354.9-755), 3      | 475.5 (374.5-588.2), 12    | 0.536 |
|                              | P <sub>Kruskal-Wallis</sub> |                           | 0.811                      | 0.822 |
| RBC folates corrected nmol/L | AA                          | 515.2 (362-653.6), 65     | 474.4 (370.8-633.5), 173   | 0.453 |
|                              | AG                          | 534.7 (389.3-684.4), 25   | 497.5 (359.8-699.6), 93    | 0.782 |
|                              | GG                          | 688.0 (314.5-722.2), 3    | 434.55 (360.6-566.65), 12  | 0.633 |
|                              | P <sub>Kruskal-Wallis</sub> |                           | 0.891                      | 0.754 |
| Homocysteine μmol/L          | AA                          | 15.7 (11.2-18.3), 89      | 14.7 (12-18.6), 245        | 0.538 |
|                              | AG                          | 15.88 (12.5-19.2), 35     | 14.5 (11.85-18.5), 132     | 0.426 |
|                              | GG                          | 14.8 (13.7-19.8), 5       | 16.45 (12.5-18.7), 18      | 0.857 |
|                              | P <sub>Kruskal-Wallis</sub> |                           | 0.769                      | 0.655 |
| TYMS 3'UTR ins/del           |                             |                           |                            |       |
| Serum folates nmol/L         | II                          | 19.7 (13.6-24), 67        | 18.1 (13.8-23.4), 179      | 0.789 |
|                              | ID                          | 18.1 (14.3-24.3), 61      | 17.1 (12.9-23.1), 182      | 0.345 |
|                              | DD                          | 22.45 (17.55-25.2), 4     | 13.8 (11.1-17.7), 33       | 0.078 |
|                              | P <sub>Kruskal-Wallis</sub> |                           | 0.744                      | 0.032 |
| RBC folates nmol/L           | II                          | 602.0 (444.2-756.7), 46   | 502.05 (372.3-727.5), 126  | 0.111 |
|                              | ID                          | 491.55 (372.05-632.5), 44 | 515.4 (391.6-670.0), 125   | 0.441 |
|                              | DD                          | 411.6 (259.8-1446.6), 3   | 454.2 (364.55-580.45), 28  | 0.875 |
|                              | P <sub>Kruskal-Wallis</sub> |                           | 0.132                      | 0.372 |
| RBC folates corrected nmol/L | II                          | 572.4 (405.7-729.2), 46   | 473.45 (352.3-680.0), 126  | 0.115 |
|                              | ID                          | 468.85 (340.95-605.5), 44 | 486.55 (372.15-634.5), 124 | 0.456 |
|                              | DD                          | 378.6 (242.2-1406.7), 3   | 425.8 (340.35-560.25), 28  | 0.875 |
|                              | P <sub>Kruskal-Wallis</sub> |                           | 0.124                      | 0.428 |
| Homocysteine μmol/L          | II                          | 14.8 (11.4-17.5), 65      | 15.5 (12.7-19.2), 179      | 0.050 |
|                              | ID                          | 16.25 (11.95-19.5), 60    | 13.6 (11.6-18.3), 183      | 0.173 |
|                              | DD                          | 18.65 (17.55-20.05), 4    | 14.7 (12.0-17.7), 33       | 0.056 |
|                              | P <sub>Kruskal-Wallis</sub> |                           | 0.060                      | 0.042 |
| TYMS 5'UTR 2R/3R             |                             |                           |                            |       |
| Serum folates nmol/L         | 2R/2R                       | 20.5 (15.15-25.15), 32    | 18.5 (14.4-22.65), 72      | 0.317 |
|                              | 2R/3R                       | 18.6 (13.8-24.3), 66      | 17.0 (12.5-23.1), 205      | 0.504 |
|                              | 3R/3R                       | 19.05 (14.5-24.0), 34     | 17.2 (12.7-22.9), 117      | 0.477 |
|                              | P <sub>Kruskal-Wallis</sub> |                           | 0.522                      | 0.400 |
| RBC folates nmol/L           | 2R/2R                       | 570.4 (395.5-748.75), 20  | 512.6 (385.3-684.2), 47    | 0.709 |
|                              | 2R/3R                       | 567.0 (411.6-733.7), 45   | 541.5 (391.6-689.2), 146   | 0.526 |
|                              | 3R/3R                       | 521.85 (351.55-671.7), 28 | 454.55 (358.5-619.7), 86   | 0.538 |
|                              | P <sub>Kruskal-Wallis</sub> |                           | 0.412                      | 0.069 |

|                              |                             |                            |                            |       |
|------------------------------|-----------------------------|----------------------------|----------------------------|-------|
| RBC folates corrected nmol/L | 2R/2R                       | 535.8 (368.3-712.2), 20    | 477.0 (367.0-657.7), 47    | 0.737 |
|                              | 2R/3R                       | 541.8 (382.4-688.0), 45    | 517.85 (371.5-658.7), 146  | 0.548 |
|                              | 3R/3R                       | 494.65 (326.6-628.8), 28   | 430.1 (343.6-578.4), 85    | 0.552 |
|                              | P <sub>Kruskal-Wallis</sub> |                            | 0.396                      | 0.049 |
| Homocysteine μmol/L          | 2R/2R                       | 14.8 (11.2-18.1), 31       | 15.95 (12.15-20.2), 72     | 0.222 |
|                              | 2R/3R                       | 15.55 (11.95-18.7), 64     | 14.3 (11.75-18.15), 204    | 0.415 |
|                              | 3R/3R                       | 16.3 (11.4-19.4), 34       | 14.7 (12.1-18.8), 119      | 0.949 |
|                              | P <sub>Kruskal-Wallis</sub> |                            | 0.705                      | 0.103 |
| DHFR c.86+60_78ins22         |                             |                            |                            |       |
| Serum folates nmol/L         | II                          | 18.5 (13.95-22.9), 36      | 17.7 (13.1-23.6), 119      | 0.909 |
|                              | ID                          | 20.4 (14.4-25.6), 72       | 17.2 (12.6-22.9), 196      | 0.042 |
|                              | DD                          | 18.0 (12.1-23.45), 24      | 17.5 (12.7-22.7), 79       | 0.827 |
|                              | P <sub>Kruskal-Wallis</sub> |                            | 0.222                      | 0.747 |
| RBC folates nmol/L           | II                          | 466.5 (353.2-656.0), 31    | 512.8 (429.3-670.0), 86    | 0.194 |
|                              | ID                          | 590.9 (457.25-766.15), 48  | 506.3 (354.9-688.85), 136  | 0.068 |
|                              | DD                          | 544.9 (372.3-682.0), 14    | 492.2 (382.7-616.7), 57    | 0.823 |
|                              | P <sub>Kruskal-Wallis</sub> |                            | 0.055                      | 0.661 |
| RBC folates corrected nmol/L | II                          | 441.5 (328.5-622.8), 31    | 486.55 (398.3-628.1), 86   | 0.171 |
|                              | ID                          | 563.5 (439.55-729.1), 48   | 469.1 (332.9-654.5), 135   | 0.065 |
|                              | DD                          | 513.15 (343.5-641.3), 14   | 464.0 (361.4-595.0), 57    | 0.868 |
|                              | P <sub>Kruskal-Wallis</sub> |                            | 0.066                      | 0.633 |
| Homocysteine μmol/L          | II                          | 16.4 (11.9-17.8), 35       | 14.6 (12.0-18.5), 118      | 0.434 |
|                              | ID                          | 14.7 (11.2-18.3), 70       | 14.5 (12.4-18.7), 198      | 0.366 |
|                              | DD                          | 15.84 (12.3-19.9), 24      | 15.0 (11.7-18.6), 79       | 0.728 |
|                              | P <sub>Kruskal-Wallis</sub> |                            | 0.503                      | 0.907 |
| TCN2 c.776C>G                |                             |                            |                            |       |
| Serum folates nmol/L         | CC                          | 19.3 (13.8-23.8), 39       | 17.0 (12.7-23.1), 124      | 0.450 |
|                              | CG                          | 19.5 (14.75-24.7), 64      | 17.8 (12.9-23.4), 182      | 0.273 |
|                              | GG                          | 18.1 (13.6-24.0), 29       | 17.35 (13.4-22.1), 88      | 0.820 |
|                              | P <sub>Kruskal-Wallis</sub> |                            | 0.638                      | 0.829 |
| RBC folates nmol/L           | CC                          | 623.35 (446.5-692.3), 24   | 513.7 (381.8-670.4), 89    | 0.188 |
|                              | CG                          | 548.3 (419.5-752.4), 45    | 494.5 (392.3-684.7), 129   | 0.470 |
|                              | GG                          | 491.55 (339.7-722.3), 24   | 510.2 (346.4-652.1), 61    | 0.643 |
|                              | P <sub>Kruskal-Wallis</sub> |                            | 0.369                      | 0.972 |
| RBC folates corrected nmol/L | CC                          | 596.15 (417.95-665.25), 24 | 478.5 (359.1-642.5), 89    | 0.192 |
|                              | CG                          | 516.4 (382.4-729.2), 45    | 460.2 (370.75-643.25), 128 | 0.510 |
|                              | GG                          | 468.85 (309.9-685.0), 24   | 472.5 (332.2-614.7), 61    | 0.588 |
|                              | P <sub>Kruskal-Wallis</sub> |                            | 0.342                      | 0.955 |
| Homocysteine μmol/L          | CC                          | 13.75 (10.2-16.7), 38      | 14.2 (12.0-17.7), 125      | 0.093 |
|                              | CG                          | 16.5 (12-18.8), 62         | 14.7 (11.7-18.9), 182      | 0.516 |
|                              | GG                          | 16.4 (13.7-20.6), 29       | 15.45 (13.1-19.45), 88     | 0.611 |
|                              | P <sub>Kruskal-Wallis</sub> |                            | 0.014                      | 0.153 |
| SLC19A1 c.80G>A              |                             |                            |                            |       |
| Serum folates nmol/L         | GG                          | 18.1 (12.7-23.8), 35       | 16.4 (12.9-23.1), 114      | 0.941 |
|                              | GA                          | 19.15 (14.4-23.8), 68      | 17.7 (12.7-23.4), 190      | 0.483 |
|                              | AA                          | 22.4 (15.6-25.4), 29       | 17.7 (13.4-22.2), 90       | 0.035 |
|                              | P <sub>Kruskal-Wallis</sub> |                            | 0.194                      | 0.933 |
| RBC folates nmol/L           | GG                          | 572.4 (434-733.25), 28     | 511.85 (388.2-755.45), 80  | 0.512 |
|                              | GA                          | 546.85 (396.25-692.3), 44  | 515.2 (387.05-688.45), 140 | 0.924 |
|                              | AA                          | 517.2 (371.8-756.7), 21    | 482.6 (372.3-639.7), 59    | 0.330 |
|                              | P <sub>Kruskal-Wallis</sub> |                            | 0.726                      | 0.331 |

|                                    |                             |                           |                           |       |
|------------------------------------|-----------------------------|---------------------------|---------------------------|-------|
| RBC folates<br>corrected<br>nmol/L | GG                          | 539.3 (409.95-708.85), 28 | 484.2 (371.5-705.6), 79   | 0.485 |
|                                    | GA                          | 519.95 (370.3-659.1), 44  | 488.4 (367.35-656.6), 140 | 0.970 |
|                                    | AA                          | 481.9 (332.9-726.5), 21   | 452.9 (347.5-621.5), 59   | 0.370 |
|                                    | $P_{\text{Kruskal-Wallis}}$ |                           | 0.739                     | 0.320 |
| Homocysteine<br>$\mu\text{mol/L}$  | GG                          | 15.25 (12.0-18.3), 34     | 14.45 (12.0-18.7), 114    | 0.897 |
|                                    | GA                          | 16.3 (11.2-18.7), 67      | 14.7 (11.9-18.4), 191     | 0.925 |
|                                    | AA                          | 15.45 (11.85-16.9), 28    | 15.55 (12.5-18.9), 90     | 0.688 |
|                                    | $P_{\text{Kruskal-Wallis}}$ |                           | 0.957                     | 0.857 |
