# Supplementary material for: Folate/homocysteine metabolism and lung cancer risk among smokers
Source: PubMed Central journal article supplement (PMC6445430; doi:10.1371/journal.pone.0214462), 2019-04-02
Supplement: pone.0214462.s004.pdf [file pone.0214462.s004.pdf]

## Folate/homocysteine metabolism and lung cancer risk among smokers

Stanisławska-Sachadyn A, Borzyszkowska J, Krzemiński M, Janowicz A, Dziadziuszko R, Jassem J, Rzyman W, Limon J

### Supporting information, S3 Table

**S3 Table. Median (interquartile ranges), N, of serum folate, RBC folate, corrected RBC folate and homocysteine defined by the *SLC19A1* c.80G>A genotypes and sex.**

Two outlying extreme values were deleted from the analyses: serum folate = 800.5; 565.4 nmol/l.

| Variable                        | SLC19A1                     | Lung cancer cases*        | Controls*                  | P <sub>wilcoxon</sub> |
|---------------------------------|-----------------------------|---------------------------|----------------------------|-----------------------|
| Females                         |                             |                           |                            |                       |
| Serum folates<br>nmol/L         | GG                          | 18.6 (13.1-24), 11        | 17.7 (14.5-27.4), 57       | 0.868                 |
|                                 | GA                          | 19.3 (15.4-25.6), 31      | 18.1 (13.1-24.3), 94       | 0.377                 |
|                                 | AA                          | 22.9 (14.3-25.4), 19      | 17.9 (12.9-22.9), 31       | 0.139                 |
|                                 | P <sub>Kruskal-Wallis</sub> |                           | 0.687                      | 0.643                 |
| RBC folates<br>nmol/L           | GG                          | 525.8 (348.8-768.1), 8    | 520.5 (425-697.9), 39      | 0.857                 |
|                                 | GA                          | 502.3 (349.25-692.3), 20  | 525.8 (381.8-725.9), 66    | 0.606                 |
|                                 | AA                          | 517.2 (419.5-721.9), 13   | 441.3 (375.4-677.4), 18    | 0.650                 |
|                                 | P <sub>Kruskal-Wallis</sub> |                           | 0.876                      | 0.586                 |
| RBC folates corrected<br>nmol/L | GG                          | 494.75 (318.1-738.95), 8  | 489.3 (412.4-682.4), 39    | 0.813                 |
|                                 | GA                          | 466.15 (324.4-659.1), 20  | 489.95 (357.6-699.6), 66   | 0.543                 |
|                                 | AA                          | 481.9 (382.4-688), 13     | 404.8 (359.8-633.5), 18    | 0.650                 |
|                                 | P <sub>Kruskal-Wallis</sub> |                           | 0.861                      | 0.570                 |
| Homocysteine<br>μmol/L          | GG                          | 14.1 (12-17.5), 11        | 13.0 (11.2-14.8), 57       | 0.424                 |
|                                 | GA                          | 16.6 (11.4-18.1), 30      | 14.3 (11.3-18.3), 95       | 0.642                 |
|                                 | AA                          | 16.25 (14.08-19.8), 18    | 13.0 (11.3-16.5), 31       | 0.081                 |
|                                 | P <sub>Kruskal-Wallis</sub> |                           | 0.681                      | 0.411                 |
| Males                           |                             |                           |                            |                       |
| Serum folates<br>nmol/L         | GG                          | 18.0 (12.45-23.25), 24    | 15.2 (12.7-22.4), 57       | 0.706                 |
|                                 | GA                          | 17.5 (11.8-22.2), 37      | 17.35 (12.7-22.3), 96      | 0.984                 |
|                                 | AA                          | 21.95 (16.3-25.6), 10     | 17.5 (13.4-22), 59         | 0.143                 |
|                                 | P <sub>Kruskal-Wallis</sub> |                           | 0.373                      | 0.708                 |
| RBC folates<br>nmol/L           | GG                          | 578.2 (517.3-723.65), 20  | 494.9 (383.5-781.7), 41    | 0.348                 |
|                                 | GA                          | 549.85 (430.1-681.45), 24 | 507.5 (392.3-642.2), 74    | 0.490                 |
|                                 | AA                          | 596.4 (362.5-785.3), 8    | 483.3 (349.5-621.6), 41    | 0.386                 |
|                                 | P <sub>Kruskal-Wallis</sub> |                           | 0.777                      | 0.680                 |
| RBC folates corrected<br>nmol/L | GG                          | 545.6 (487.1-702.75), 20  | 459.75 (361.85-723.85), 40 | 0.315                 |
|                                 | GA                          | 528.5 (416.95-646.8), 24  | 488.4 (367.7-614.7), 74    | 0.490                 |
|                                 | AA                          | 563.95 (330.7-755.8), 8   | 457.7 (338.1-602), 41      | 0.464                 |
|                                 | P <sub>Kruskal-Wallis</sub> |                           | 0.813                      | 0.622                 |
| Homocysteine<br>μmol/L          | GG                          | 15.6 (11.1-19.2), 23      | 17.1 (13.2-20), 57         | 0.473                 |
|                                 | GA                          | 16.1 (11.2-19.4), 37      | 15.0 (12.35-18.6), 96      | 0.675                 |
|                                 | AA                          | 12.9 (11.7-15.8), 10      | 16.3 (12.7-21.2), 59       | 0.049                 |
|                                 | P <sub>Kruskal-Wallis</sub> |                           | 0.650                      | 0.334                 |
